# Supplementary material for: Cellulose: a study of drying method selection based on the structure and property changes
Source: Research Square preprint supplement (doi:10.21203/rs.3.rs-7716776/v1), 2025-12-18
Supplement: Supplementary file 1 [file 4ae6c8a4d166ea08a1b49ade.docx]

Supporting Information for

**Cellulose: a study of drying method selection based on the structure and property changes**

Qing Wang a, b, d, Zhenfei Han a, Zhixiao Mao a, Xue Wan c, Jinxiang Hua a, Yongmei Zeng a, Jinguang Hu d, and Fei Shen a*

*a College of Environmental Sciences, Sichuan Agricultural University, Chengdu, Sichuan 611130, P. R. China.*

*b Chengdu Academy of Agriculture and Forestry Sciences, Chengdu, Sichuan 611130, P. R. China.*

*c Institute of Agricultural Resources and Environment, Sichuan Academy of Agricultural Sciences, Chengdu, Sichuan 610066, P. R. China.*

*d Department of Chemical and Petroleum Engineering, Schulich School of Engineering, the University of Calgary, Calgary T2N 4H9, Canada.*

**To whom correspondence should be addressed:**

Fei Shen ([fishen@sicau.edu.cn](mailto:fishen@sicau.edu.cn)).

**Content:**

**Fig. S1** Residual weight of BC after TG analysis.

**Fig. S2** Residual weight of RCFs after TG analysis.





**Fig. S1** Residual weight of BC after TG analysis. TBA freeze-dried (T), supercritical CO2-dried (S), freeze-dried (F), vacuum-dried (V), oven-dried (O), microwave-dried (M).





**Fig. S2** Residual weight of RCFs after TG analysis. TBA freeze-dried (T), supercritical CO2-dried (S), freeze-dried (F), vacuum-dried (V), oven-dried (O), microwave-dried (M).
